# Supplementary material
Source: Research Square preprint supplement (doi:10.21203/rs.3.rs-8485533/v1)

**Title:** Evaluating the role of burrowing sea urchins as agents of coral reef bioerosion

**Journal Name:** Coral Reefs (Journal of the International Coral Reef Society)

**Author names** - [Siddhi Jaishankar](mailto:siddhi.jaishankar@gmail.com)1,3, [Radhika Nair](mailto:radhikanair@ncf-india.org)1,3, Mayukh Dey3, Wenzel Pinto3, [Teresa Alcoverro](mailto:teresa@ceab.csic.es)2,3 ,Rohan Arthur3,2

**Affiliations:**

1 National Centre for Biological Sciences, Tata Institute of Fundamental Research, Bellary Road, Bangalore 560065, Karnataka, India

2 Centre d’Estudis Avançats de Blanes (CSIC), c/Acc Cala St. Francesc 14, 17300 Blanes, Spain

3 Nature Conservation Foundation, 1311 Amritha, 12th Cross, Vijayanagar 1st Stage, Mysore 570017, Karnataka, India

**Corresponding author-** Siddhi Jaishankar

**Corresponding author mail-** [siddhi.jaishankar@gmail.com](mailto:siddhi.jaishankar@gmail.com)

**ORCID ID:** 0009-0005-3042-2786

***Table S1: Indicators of anthropogenic nutrient input at studied islands.***

| **Island name** | **Human population** | **No. of Septic Tanks** | **Percentage turf algae** | **Ranking (in terms of anthropogenic nutrient input)** |
| --- | --- | --- | --- | --- |
| Kavaratti | 11,221 | 2,414 | 11.70 | High |
| Agatti | 7,566 | 1,279 | 10.63 | Medium |
| Kadmat | 5,404 | 899 | 1.38 | Low |
| Bangaram | 0 | 0 | 0.26 | Very low |

*Data: Human population (Census of India 2011); No. of Septic Tanks (Department of Environment, Forests and Climate Change, Lakshadweep); macroalgal cover: see methods section in main article)*

***Table S2: List of fish species observed approaching or attacking sea urchins during assays***

| **S. No** | **Common name** | **Scientific name** | **Family** | **Predation observed** |
| --- | --- | --- | --- | --- |
| 1. | Orange-striped triggerfish | *Balistapus undulatus* | Balistidae | Yes |
| 2. | Jansen’s wrasse | *Thalassoma jansenii* | Labridae | Yes |
| 3. | Checkerboard wrasse | *Halichoeres hortulanus* | Labridae | Yes |
| 4. | Crescent/Moon wrasse | *Thalassoma lunare* | Labridae | No |
| 5. | Indian triggerfish | *Melichthys indicus* | Balistidae | No |

***Table S3: Multicollinearity check (VIF) and performance***

| **Term** | **VIF** | **VIF_CI_low** | **VIF_CI_high** | **SE_factor** | **Tolerance** | **Tolerance_CI_low** | **Tolerance_CI_high** |
| --- | --- | --- | --- | --- | --- | --- | --- |
| Predator biomass | 1.051767 | 1.005013 | 1.534540 | 1.025557 | 0.9507810 | 0.6516612 | 0.9950117 |
| Aspect | 1.042411 | 1.002576 | 1.698379 | 1.020985 | 0.9593143 | 0.5887969 | 0.9974311 |
| Island | 1.388976 | 1.235786 | 1.641695 | 1.178548 | 0.7199547 | 0.6091265 | 0.8092018 |
| Rugosity | 1.126428 | 1.042708 | 1.374266 | 1.061333 | 0.8877622 | 0.7276613 | 0.9590417 |
| Available Substrate | 1.297992 | 1.165754 | 1.535729 | 1.139295 | 0.7704207 | 0.6511567 | 0.8578138 |
| Depth | 1.147043 | 1.056085 | 1.385512 | 1.071001 | 0.8718070 | 0.7217550 | 0.9468931 |

All VIF values are close to 1, hence the model appears to be healthy in terms of multicollinearity. Additionally, the standard errors (SE_factor column) are only slightly inflated, indicating that our confidence intervals and p-values remain reliable.

***Table S4: Generalised linear model output for urchin bioerosion potential***

|  | **Estimate** | **Standard Error** | **z value** | **Pr(>|z|)** |  |
| --- | --- | --- | --- | --- | --- |
| Intercept: Agatti | 6.608 | 0.370 | 17.852 | < 2*e*-16 | *** |
| Predator biomass | 0.032 | 0.059 | 0.543 | 0.5874 |  |
| Aspect: West | -0.677 | 0.117 | -5.779 | *7.51e*-9 | *** |
| Bangaram | 0.465 | 0.181 | 2.572 | 0.0101 | * |
| Kadmat | -0.053 | 0.176 | -0.303 | 0.7615 |  |
| Kavaratti | 1.923 | 0.185 | 10.388 | < 2*e*-16 | *** |
| Structural Complexity | -1.563 | 0.250 | -6.250 | 4.1*e*-10 | *** |
| Available Substrate | 0.215 | 0.065 | 3.303 | 0.0010 | *** |
| Depth | -0.013 | 0.061 | -0.220 | 0.8259 |  |
| *Signif. codes: 0 <= '***' < 0.001 < '**' < 0.01 < '*' < 0.05* | | | | | |
| (Dispersion parameter for Negative Binomial (1.0536) family taken to be 1) | | | | | |
| Null deviance: 633.6 on 293 degrees of freedom | | | | | |
| Residual deviance: 336.6 on 285 degrees of freedom | | | | | |
|  | | | | | |

***Fig. S3 Ivlev’s electivity index (Mean SE) per substrate for E. molaris***

***
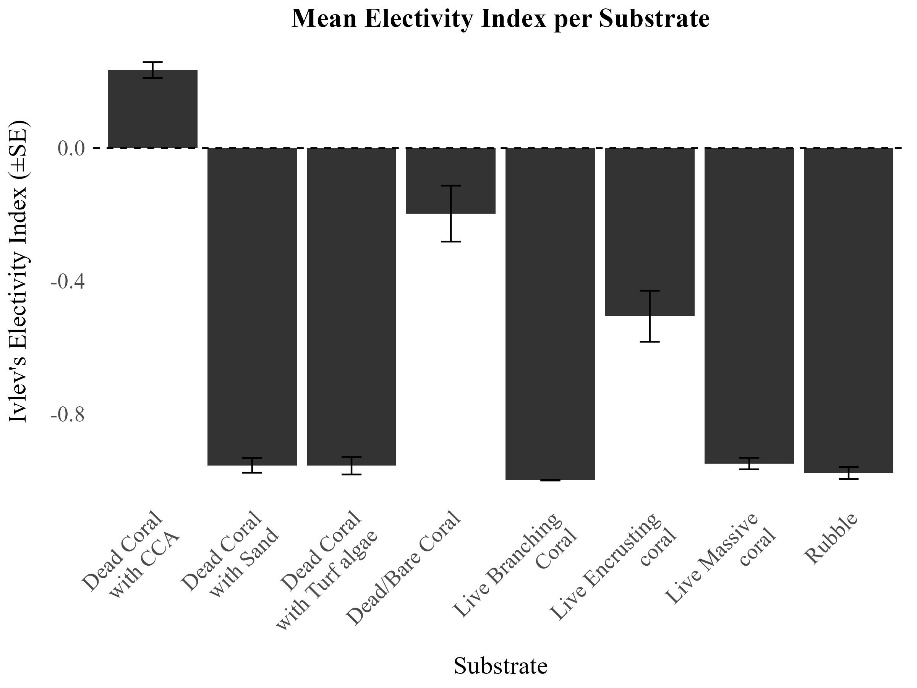
***

There was a clear preference for Dead Coral with CCA [E = 0.23 0.02 (SE)]. All other substrate types showed negative electivity values, indicating avoidance. The strongest avoidance was observed for Branching Coral [E = -0.99 0.001 (SE)], Rubble [E = -0.98 0.02 (SE)], Dead coral with Turf Algae [E = -0.96 0.02 (SE)], and Dead Coral with Sand [E = -0.95 0.02 (SE)]. Moderate avoidance was seen for Live Massive Coral [E = -0.95 0.02 (SE)], Live Encrusting Coral [E = -0.51 0.08 (SE)], and Dead/Bare Coral [E = -0.19 0.08 (SE)].

***Fig S4. Urchin Test Diameter and Burrow Diameter***


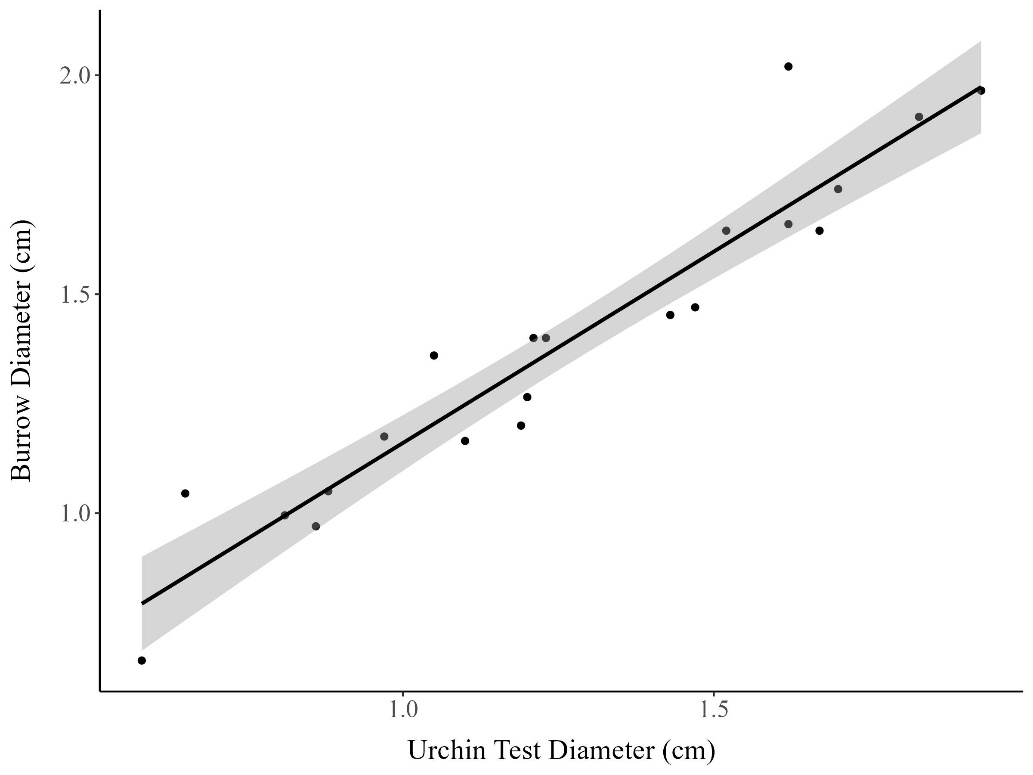

Supplement: Supplementary file 1 [file d46666691b7e2d83d395f212.docx]
